# Supplementary material for: Natural Products Self-Assembled Nanozyme for Cascade Detection of Glucose and Bacterial Viability in Food
Source: MDPI journal article supplement (doi:10.3390/foods10112596), 2021-10-27
Supplement: s1 [file s1]

# Supplementary Materials: Natural Products

## Self-Assembled Nanozyme for Cascade Detection of Glucose and Bacterial Viability in Food

Qiuping Zhang, Yi Kang, Hao Sun, Yanmin Liang, Zehui Su, Jie Dan, Linpin Luo, Tianli Yue,

Jianlong Wang \*, Wentao Zhang \*

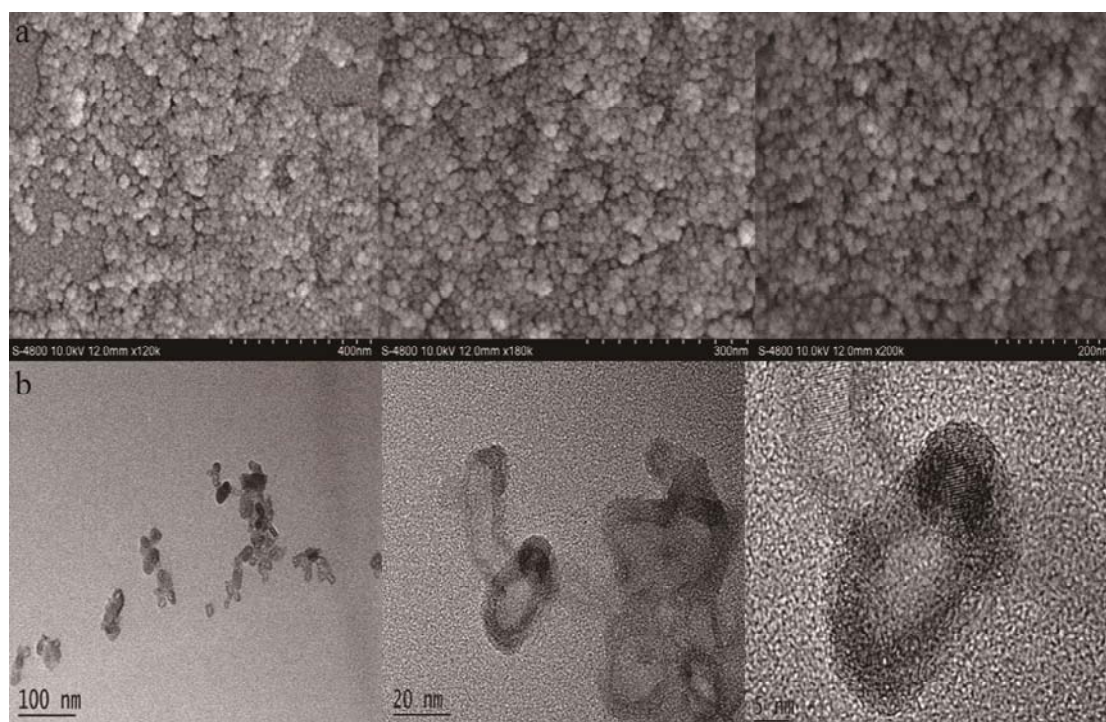

**Figure S1.** The morphology of nanomaterials with different sizes, including SEM image (a); and TEM image (b).

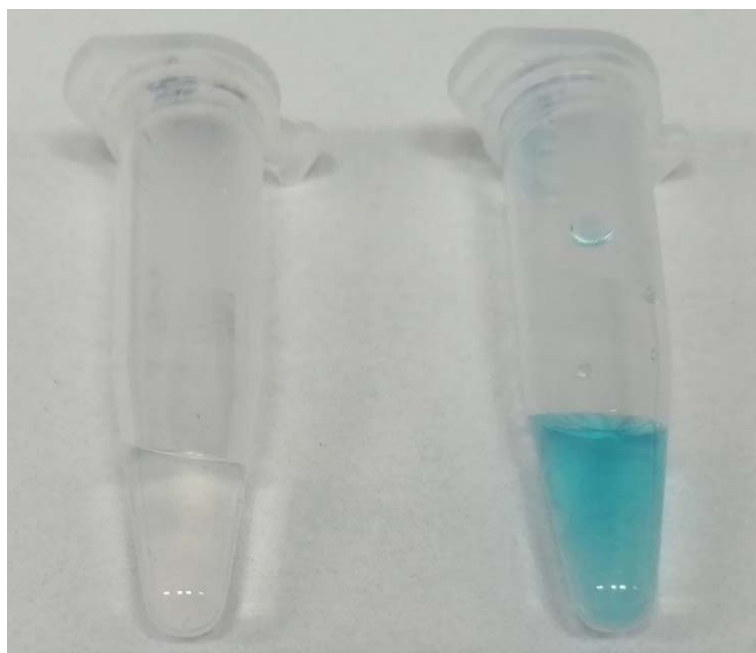

**Figure S2.** Effect of the presence of glucose on the chromogenic reaction: GOx@GA-Fe (II) +TMB (a); GOx@GA-Fe (II) +TMB +Glucose (b). The concentration of Glucose was 100  $\mu$ L, and the other conditions were the same.

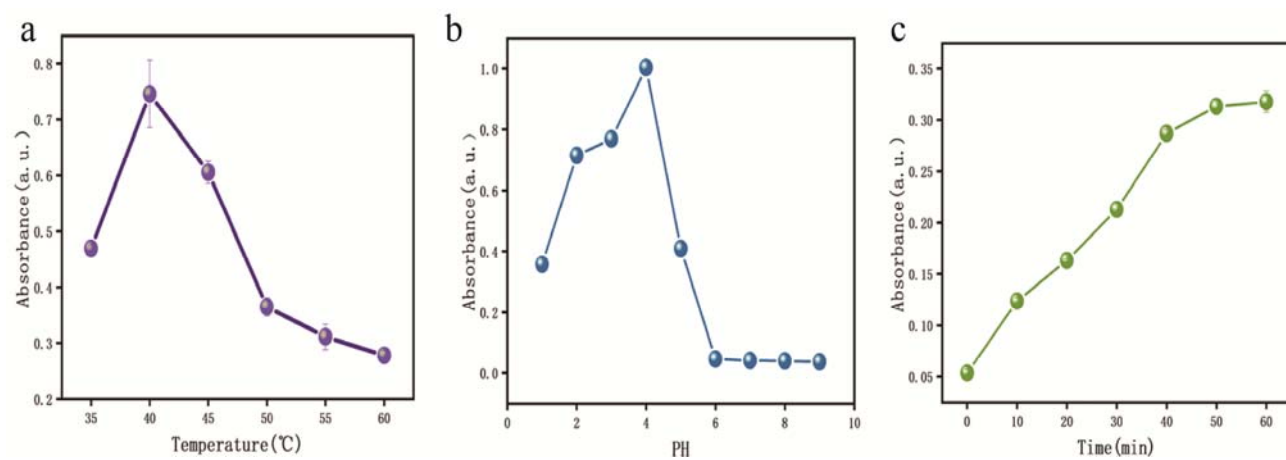

**Figure S3.** Optimization of material reaction conditions, including temperature (a); pH(b) and reaction time(c).

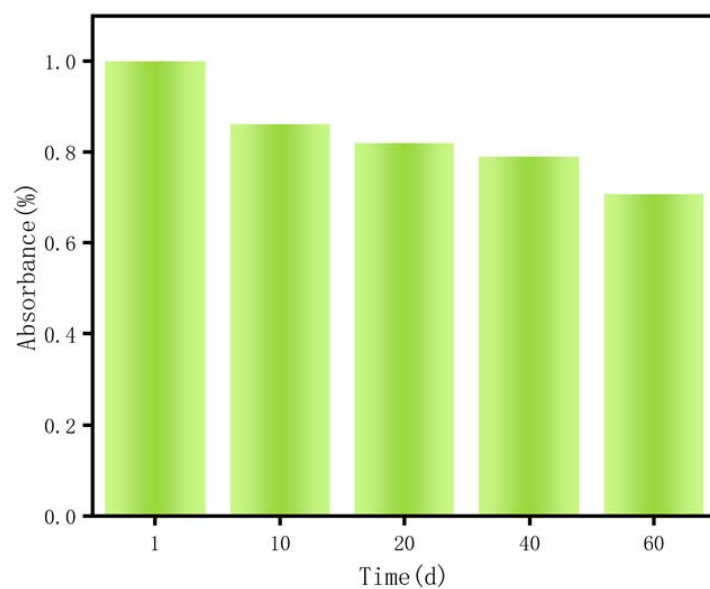

**Figure S4.** Stability detection of GOx@GA-Fe (ii) from 1 to 60 days.

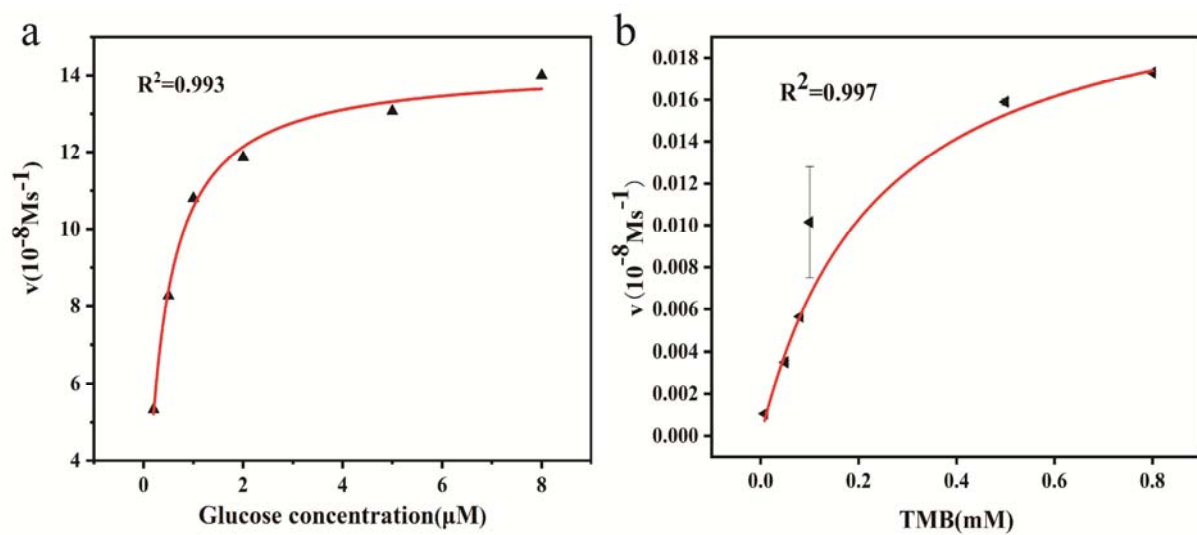

**Figure S5.** The steady-state kinetics of GOx@GA-Fe (II)/glucose(a) and GOx@GA-Fe (II) /TMB(b).

**Table S1** Comparison of the ability of different nanometer syntheses to detect glucose.

| <b>Nanozyme</b>                            | <b>Linear range(<math>\mu\text{M}</math>)</b> | <b>LOD(<math>\mu\text{M}</math>)</b> | <b>Ref</b> |
|--------------------------------------------|-----------------------------------------------|--------------------------------------|------------|
| <b>GOx@CuBDC</b>                           | 10–500                                        | 4.1                                  | [1]        |
| <b>GOx@ZIF-8(NiPd)</b>                     | 10–300                                        | 9.2                                  | [2]        |
| <b>GOx@MOF-545(Fe)</b>                     | 0.5–100                                       | 0.28                                 | [3]        |
| <b>H<sub>2</sub>TCPP-NiO + GOx</b>         | 50–500                                        | 20                                   | [4]        |
| <b>2D Au NPs/Cu-TCPP(Fe)</b>               | 10–300                                        | 8.4                                  | [5]        |
| <b>Au@Ag + GOx</b>                         | 50–20,000                                     | 39                                   | [6]        |
| <b>SiO<sub>2</sub>/Imi/Pt/GOx</b>          | 100–800                                       | 163                                  | [7]        |
| <b>Chitosan-Au</b>                         | 1–5000                                        | 3                                    | [8]        |
| <b>CNT-CS-Au</b>                           | 6–5000                                        | 3                                    | [9]        |
| <b>Au@Ag NRs</b>                           | 50–20,000                                     | 39                                   | [6]        |
| <b>Fe<sub>3</sub>O<sub>4</sub>-Au-CS</b>   | 3–570                                         | 1.2                                  | [10]       |
| <b>Porphyrin-ZnS</b>                       | 50–500                                        | 36                                   | [11]       |
| <b>Fe<sub>3</sub>O<sub>4</sub>@CN-GQDs</b> | 6–100                                         | 2                                    | [12]       |
| <b>Humic acid-Cu</b>                       | 1–100                                         | 0.68                                 | [13]       |
| <b>Carbon nanodots</b>                     | 1–50                                          | 0.4                                  | [14]       |
| <b>AuNPs@C.CNF</b>                         | 1–60                                          | 0.67                                 | [15]       |
| <b>GOx@GA-Fe(II)</b>                       | 0.1–500                                       | 0.43                                 | This paper |

## Reference

---

- 1 Cheng, X.; Zheng, Z.; Zhou, X.; Kuang, Q., Metal–Organic Framework as a Compartmentalized Integrated Nanozyme Reactor to Enable High-Performance Cascade Reactions for Glucose Detection. *ACS Sustainable Chemistry & Engineering* 2020, 8 (48), 17783-17790.
- 2 Wang, Q.; Zhang, X.; Huang, L.; Zhang, Z.; Dong, S., GOx@ ZIF - 8 (NiPd) nanoflower: An artificial enzyme system for tandem catalysis. *Angewandte Chemie* 2017, 129 (50), 16298-16301.
- 3 Zhong, X.; Xia, H.; Huang, W.; Li, Z.; Jiang, Y., Biomimetic metal-organic frameworks mediated hybrid multi-enzyme mimic for tandem catalysis. *Chemical Engineering Journal* 2020, 381, 122758.
- 4 Liu, Q.; Yang, Y.; Li, H.; Zhu, R.; Shao, Q.; Yang, S.; Xu, J., NiO nanoparticles modified with 5, 10, 15, 20-tetrakis (4-carboxyl phenyl)-porphyrin: promising peroxidase mimetics for H<sub>2</sub>O<sub>2</sub> and glucose detection. *Biosensors and Bioelectronics* 2015, 64, 147-153.
- 5 Huang, Y.; Zhao, M.; Han, S.; Lai, Z.; Yang, J.; Tan, C.; Ma, Q.; Lu, Q.; Chen, J.; Zhang, X., Growth of au nanoparticles on 2D metalloporphyrinic metal - organic framework nanosheets used as biomimetic catalysts for cascade reactions. *Advanced Materials* 2017, 29 (32), 1700102.
- 6 Han, L.; Li, C.; Zhang, T.; Lang, Q.; Liu, A., Au@ Ag heterogeneous nanorods as nanozyme interfaces with peroxidase-like activity and their application for one-pot analysis of glucose at nearly neutral pH. *ACS applied materials & interfaces* 2015, 7 (26), 14463-14470.
- 7 Du, Y.; Gao, J.; Liu, H.; Zhou, L.; Ma, L.; He, Y.; Huang, Z.; Jiang, Y., Enzyme@

---

silica nanoflower@ metal-organic framework hybrids: A novel type of integrated nanobiocatalysts with improved stability. *Nano Research* 2018, 11 (8), 4380-4389.

8 Jiang, C.; Zhu, J.; Li, Z.; Luo, J.; Wang, J.; Sun, Y., Chitosan–gold nanoparticles as peroxidase mimic and their application in glucose detection in serum. *RSC advances* 2017, 7 (70), 44463-44469.

9 Wang, F.; Ding, X.; Niu, X.; Liu, X.; Wang, W.; Zhang, J., Green preparation of core-shell Cu@ Pd nanoparticles with chitosan for glucose detection. *Carbohydrate Polymers* 2020, 247, 116647.

10 Li, J.; Yuan, R.; Chai, Y., Simple construction of an enzymatic glucose biosensor based on a nanocomposite film prepared in one step from iron oxide, gold nanoparticles, and chitosan. *Microchimica Acta* 2011, 173 (3-4), 369-374.

11 Liu, Q.; Chen, P.; Xu, Z.; Chen, M.; Ding, Y.; Yue, K.; Xu, J., A facile strategy to prepare porphyrin functionalized ZnS nanoparticles and their peroxidase-like catalytic activity for colorimetric sensor of hydrogen peroxide and glucose. *Sensors and Actuators B: Chemical* 2017, 251, 339-348.

12 Li, Q.; Tang, G.; Xiong, X.; Cao, Y.; Chen, L.; Xu, F.; Tan, H., Carbon coated magnetite nanoparticles with improved water-dispersion and peroxidase-like activity for colorimetric sensing of glucose. *Sensors and Actuators B: Chemical* 2015, 215, 86-92.

13 Wang, N.; Li, B.; Qiao, F.; Sun, J.; Fan, H.; Ai, S., Humic acid-assisted synthesis of stable copper nanoparticles as a peroxidase mimetic and their application in glucose detection. *Journal of materials chemistry B* 2015, 3 (39), 7718-7723.

14 Shi, W.; Wang, Q.; Long, Y.; Cheng, Z.; Chen, S.; Zheng, H.; Huang, Y., Carbon nanodots as peroxidase mimetics and their applications to glucose detection. *Chemical Communications* 2011, 47 (23), 6695-6697.



---

15 Alle, M.; Park, S. C.; Bandi, R.; Lee, S.-H.; Kim, J.-C., Rapid in-situ growth of gold nanoparticles on cationic cellulose nanofibrils: Recyclable nanozyme for the colorimetric glucose detection. *Carbohydrate Polymers* 2021, 253, 117239.
